# Supplementary material for: The Molecular Genetics of Dissociative Symptomatology: A Transdiagnostic Literature Review
Source: MDPI journal article supplement (doi:10.3390/genes13050843), 2022-05-08
Supplement: s1 [file s1]

| Reason for exclusion                                    | PubMed    | Scopus     | ProQuest  | Total      |
|---------------------------------------------------------|-----------|------------|-----------|------------|
| <b>Unrelated</b>                                        | <b>46</b> | <b>112</b> | <b>97</b> | <b>255</b> |
| Review, dissociation                                    | 9         | 11         | 10        | 30         |
| Review, general                                         | 3         | 25         | 15        | 43         |
| Original research on dissociation, no genetic component | 8         | 6          | 18        | 32         |
| Commentary / editorial / book review                    | 2         | 3          | 12        | 17         |
| Case report                                             | 3         | 1          | 4         | 8          |

**Table S2:** Numbers of papers excluded and reasons for exclusion from the review
