# Supplementary material for: The Molecular Genetics of Dissociative Symptomatology: A Transdiagnostic Literature Review
Source: MDPI journal article supplement (doi:10.3390/genes13050843), 2022-05-08
Supplement: s1 [file s1]

**Table S4:** Details of standardized measures of dissociative symptomatology used in the studies included in the current review.

| Study                | Standardized measure of dissociation used? | If yes, details of measure used                                      | Relevant findings, if provided in paper                                                                                                                                                                                        |
|----------------------|--------------------------------------------|----------------------------------------------------------------------|--------------------------------------------------------------------------------------------------------------------------------------------------------------------------------------------------------------------------------|
| Lochner et al., 2004 | Yes                                        | DES, with cut-off score $\geq 30$ to indicate "high dissociation"    | Mean DES 13.6 in OCD, 16.3 in TTM; "high dissociation" in 15.8% OCD, 18.8% TTM; no difference in genetic polymorphism distributions between "high" and "low" dissociators.                                                     |
| Koenen et al., 2005  | Yes                                        | PDEQ, PTSD-RI                                                        | FKBP5 rs3800373, rs1360870 positively associated with both PDEQ and PTSD-RI scores.                                                                                                                                            |
| Lochner et al., 2007 | Yes                                        | DES, with cut-off score $\geq 30$ to indicate "high dissociation"    | Mean DES 13.8 (16.1 in men, 12.5 in women); "high dissociation" in 16.9% OCD; childhood trauma and 5-HTTLPR s/s both positively associated with DES total score.                                                               |
| Savitz et al., 2008  | Yes                                        | DES-II, transformed to normal distribution                           | Mean DES 4.97 for the entire sample (5.70 in BD, 4.71 in relatives); BDNF Met and interaction between COMT Val and childhood trauma positively associated with DES total score.                                                |
| Tadic et al., 2009   | Yes                                        | DES, validated German adaptation; SDQ-20                             | Mean DES 16.4 in BPD, 2.5 in controls; mean SDQ-20 28 in BPD, 21 in controls; Trend association between SCN9A rs7607967 (G) and SDQ-20 score; possible interaction between rs4371369 (G) and rs4387806 (C), sex, and DES score |
| McLean et al., 2011  | Yes                                        | MCEPS, with cut-off score $>3$ indicating "significant dissociation" | Association between "pain-vulnerable" COMT haplotype (A_C_C_G) and mean MCEPS score (2.7 vs 2.2 in those with and without haplotype) following trauma.                                                                         |

|                      |     |                                                                                                                                                                  |                                                                                                                                                                                                                                |
|----------------------|-----|------------------------------------------------------------------------------------------------------------------------------------------------------------------|--------------------------------------------------------------------------------------------------------------------------------------------------------------------------------------------------------------------------------|
| Pieper et al., 2011  | Yes | DES, with cut-off score $\geq 30$ to indicate "high dissociation"                                                                                                | 5-HTTLPR s/s genotype associated with higher mean DES scores; 5-HTTLPR s/s more common in those with "high dissociation"                                                                                                       |
| Dackis et al., 2012  | Yes | DES-II, transformed to normal distribution                                                                                                                       | No direct association between FKBP5 CATT haplotype and DES-II score; interaction between FKBP5 CATT haplotype and childhood trauma associated with DES-II score                                                                |
| Schmahl et al., 2012 | Yes | DSS                                                                                                                                                              | IL6 gene expression positively correlated with DSS total score; IL1B, MAPK1, MAPK3, MAPK8, GNAI2, ARRB1, ARRB2, CREB1 expression negatively correlated with DSS total score.                                                   |
| Wolf et al., 2014    | Yes | CAPS items assessing depersonalization and derealization, with frequency score $\geq 1$ and intensity score $\geq 2$ used to identify "significant dissociation" | No dissociation in 78% of sample; "significant dissociation" in 19%; no genome-wide significant associations; ten suggestive associations with "significant dissociation"; highest peaks at ADCY8 rs263232 and DPP6 rs71534169 |
| Reiner et al., 2016  | Yes | CDS                                                                                                                                                              | Mean CDS score 45.31 in those with OXTR rs53576 G/G genotype and 28.98 in those with A/A or A/G genotype; trend-level significance.                                                                                            |
| McCoy et al., 2017   | No  | -                                                                                                                                                                | -                                                                                                                                                                                                                              |
| Yaylaci et al., 2017 | Yes | A-DES (Adolescent DES), with cut-off score $\geq 4$ indicating "pathological dissociation"                                                                       | Possible negative association between FKBP5 CATT haplotype and A-DES total score, only in those with an early onset and longer duration of maltreatment.                                                                       |
| Yu et al., 2017      | Yes | HAM-D, item 19 measuring depersonalization / derealization symptoms                                                                                              | Specific group of 19 SNPs associated with lower scores on item 19 of HAM-D; mean score 0.15 in those with the                                                                                                                  |

|                     |     |                                                                                          |                                                                                                                                         |
|---------------------|-----|------------------------------------------------------------------------------------------|-----------------------------------------------------------------------------------------------------------------------------------------|
|                     |     |                                                                                          | specified SNPs, 0.47 in those without.                                                                                                  |
| Honma et al., 2018  | Yes | DES, with sub-scores computed for depersonalization / derealization and amnesia symptoms | COMT rs4680 Val/Val genotype associated with total DES score and depersonalization / derealization sub-score but not amnesia sub-score. |
| Kember et al., 2021 | No  | -                                                                                        | -                                                                                                                                       |
| Park et al., 2021   | No  | -                                                                                        | -                                                                                                                                       |

**Abbreviations:** BD, bipolar disorder; BPD, borderline personality disorder; CAPS, Clinician-Administered PTSD scale; CDS, Cambridge Depersonalization Scale; DES, Dissociative Experiences Scale; DSS, *Dissoziations-Spannungs-Skala*; HAM-D, Hamilton Rating Scale for Depression; MCEPS, Michigan Critical Events Perception Scale; OCD, obsessive-compulsive disorder; PDEQ, Peritraumatic Dissociative Experiences Questionnaire; PPTSD-RI, PTSD Reaction Index; PTSD, post-traumatic stress disorder; SDQ-20, Somatoform Dissociation Questionnaire, 20-item version. Abbreviations used to describe genetic variants are expanded in **Table 1** in the main article.
