# Supplementary material for: The Molecular Genetics of Dissociative Symptomatology: A Transdiagnostic Literature Review
Source: MDPI journal article supplement (doi:10.3390/genes13050843), 2022-05-08
Supplement: s1 [file s1]

| Serial number | Search string                   | PubMed  | Scopus  | ProQuest |
|---------------|---------------------------------|---------|---------|----------|
| 1             | Dissociative disorder           | 420     | 6046    | 1172     |
| 2             | Dissociative disorders          | 4277    | 6046    | 2465     |
| 3             | Dissociative identity disorder  | 1078    | 827     | 1083     |
| 4             | Dissociative amnesia            | 174     | 453     | 478      |
| 5             | Derealization                   | 466     | 1261    | 1519     |
| 6             | Depersonalization               | 3821    | 7853    | 6176     |
| 7             | Pathological dissociation       | 116     | 167     | 295      |
| 8             | Genetic                         | 1859318 | 2878289 | 1432061  |
| 9             | Gene                            | 2533638 | 4066344 | 1765068  |
| 10            | (8 OR 9) AND Polymorphism       | 306083  | 474500  | 274827   |
| 11            | Genome-wide                     | 106408  | 120326  | 243598   |
| 12            | Epigenetic                      | 91480   | 105873  | 184785   |
| 13            | DNA methylation                 | 73948   | 100435  | 88283    |
| 14            | 1 OR 2 OR 3 OR 4 OR 5 OR 6 OR 7 | 8711    | 14701   | 9649     |
| 15            | 8 OR 9 OR 10 OR 11 OR 12 OR 13  | 3508019 | 5304303 | 2219171  |
| 16            | 14 AND 15                       | 85      | 230     | 273      |

**Table S1:** Search strategy for the current review
