# Supplementary material for: The Molecular Genetics of Dissociative Symptomatology: A Transdiagnostic Literature Review
Source: Genes (Basel). 2022 May 8;13(5):843. doi: 10.3390/genes13050843 (PMC9141026; doi:10.3390/genes13050843)
Supplement: Supplementary file 1 [file genes-13-00843-s001.zip › Table S3.xlsx]

## Sheet: Sheet1
Study	Year	Rationale	Outcome selection	Comparison groups	Exposure technical	Exposure non-technical	Bias	Power	Planned analyses	Statistics	Testing assumptions	Inferences	Total
McLean 2011	2011	4	3		5	2	3	2	5	5	5	5	39
Savitz 2008	2008	3	3	3	5	2	2	2	5	5	3	3	36
Dackis 2012	2012	4	5	3	6	4	3	2	5	5	5	4	46
Koenen 2005	2005	4	4		3	3	2	1	2	5	5	3	32
Yaylaci 2017	2017	5	5	4	5	3	4	2	5	5	5	3	46
Lochner 2007	2007	4	4		4	3	3	1	5	4	5	3	36
Tadic 2009	2009	3	4	5	5	3	4	4	5	5	5	5	48
Honma 2018	2018	3	4		5	4	4	2	3	3	5	3	36
Pieper 2011	2011	4	4		4	4	3	2	4	4	4	4	37
Yu 2017	2017	5	3	4	5	3	3	2	5	5	5	5	45
Wolf 2014	2014	5	4		5	5	3	2	5	5	5	5	44
McCoy 2017	2017	4	3		5	5	2	5	5	5	4	4	42
Park 2021	2021	5	4		6	5	4	5	5	5	5	5	49
Lochner 2004	2004	4	4		3	4	2	2	4	3	3	4	33
Reiner 2016	2016	5	4	4	5	4	3	2	3	2	3	4	39
Schmahl 2013	2013	3	4		3	3	3	2	4	5	5	4	36
Kember 2021	2021	5	3		6	5	4	5	5	5	5	5	48
Mean scores							3.05882	2.52941
Table S3. quality assessments of each study using the Q-Genie tool
